# Supplementary material for: Radiomics Analysis of Contrast-Enhanced CT for the Preoperative Prediction of Microvascular Invasion in Mass-Forming Intrahepatic Cholangiocarcinoma
Source: PubMed Central journal article supplement (PMC8640186; doi:10.3389/fonc.2021.774117), 2021-11-19
Supplement: Image_2.pdf [file Image_2.pdf]

Supplementary Figure.2. The process of feature selection and radiomics signature

Construction

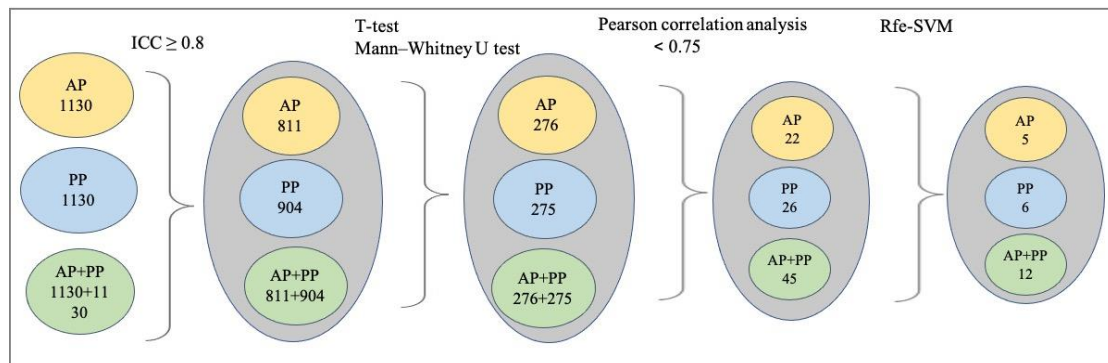

AP, arterial phase; PP, portal phase; ICC, intra- and inter-class correlation coefficients; Rfe-SVM, recursive feature elimination support vector machine.
