# Supplementary material for: Radiomics Analysis of Contrast-Enhanced CT for the Preoperative Prediction of Microvascular Invasion in Mass-Forming Intrahepatic Cholangiocarcinoma
Source: PubMed Central journal article supplement (PMC8640186; doi:10.3389/fonc.2021.774117), 2021-11-19
Supplement: Image_3.pdf [file Image_3.pdf]

Supplementary Figure.3. The distributions of Rad-score in the training and test datasets.

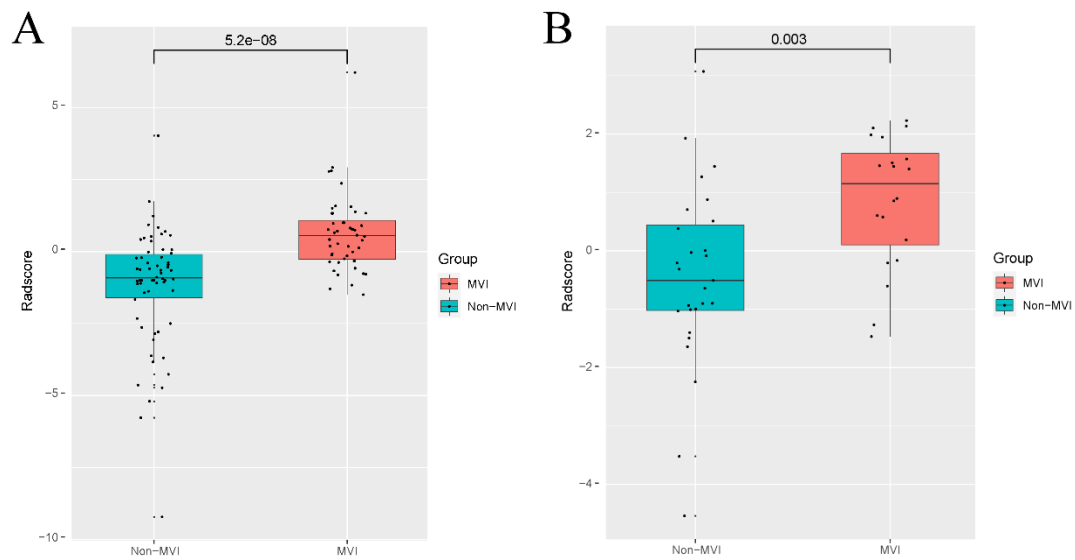

Boxplot diagrams show that the value of the Rad-score is significantly higher in patients with MVI in the training dataset (A) ( $p < 0.001$ ) and the test dataset (B) ( $p = 0.003$ ).
