# Supplementary material for: Radiomics Analysis of Contrast-Enhanced CT for the Preoperative Prediction of Microvascular Invasion in Mass-Forming Intrahepatic Cholangiocarcinoma
Source: PubMed Central journal article supplement (PMC8640186; doi:10.3389/fonc.2021.774117), 2021-11-19
Supplement: Image_4.pdf [file Image_4.pdf]

Supplementary Figure.4. Decision curve analysis

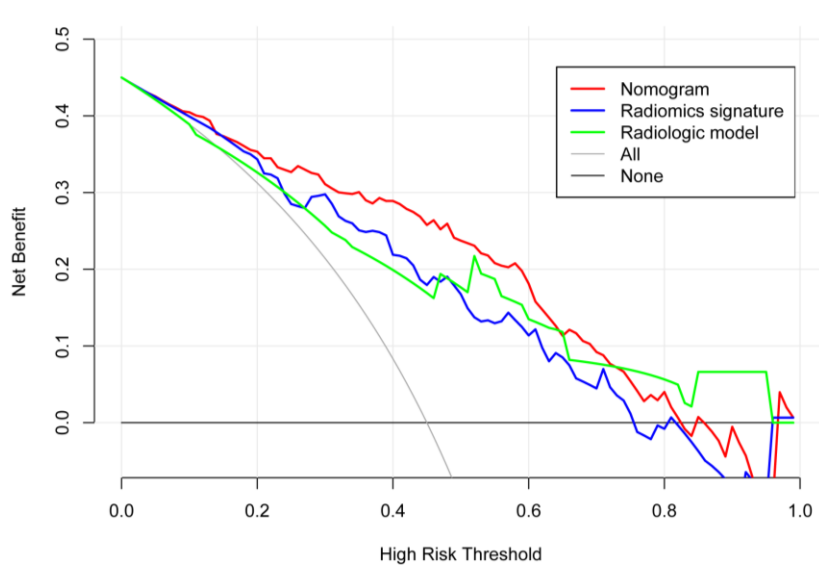

Decision curve analysis showed that the nomogram had a higher area under decision curves than Radiomics signature and radiologic model.
